# Supplementary material for: A water-soluble oil-displacing agent with tracer properties for enhancing oil recovery
Source: Royal Society of Chemistry journal article supplement (doi:10.1039/c5ra05948h), 2015-01-01
Supplement: c5ra05948h1.pdf [file c5ra05948h1.pdf]

## Electronic Supplementary Information (ESI)

### A Water-Soluble Oil-displacing Agent with Traced Property for Enhancing Oil Recovery

Liwei Yan, Ting Yin, Wenkun Yu, Linghong Shen, Mingqian Lv, Zhongbin Ye

The effect of mass ratio of AM to AA, CO concentration, pH, initiator concentration, temperature and reaction time on copolymerization of copolymer PAAC were investigated. The results are shown in Figure S1. It was found that the best results could be obtained by the ratios of AM to AA was 8:2, AMCO 0.02 wt %, initiator was 1 wt % pH was 7, temperature was 50 °C and reaction time was 10 h corresponding apparent viscosity up to 320 mPa·s.

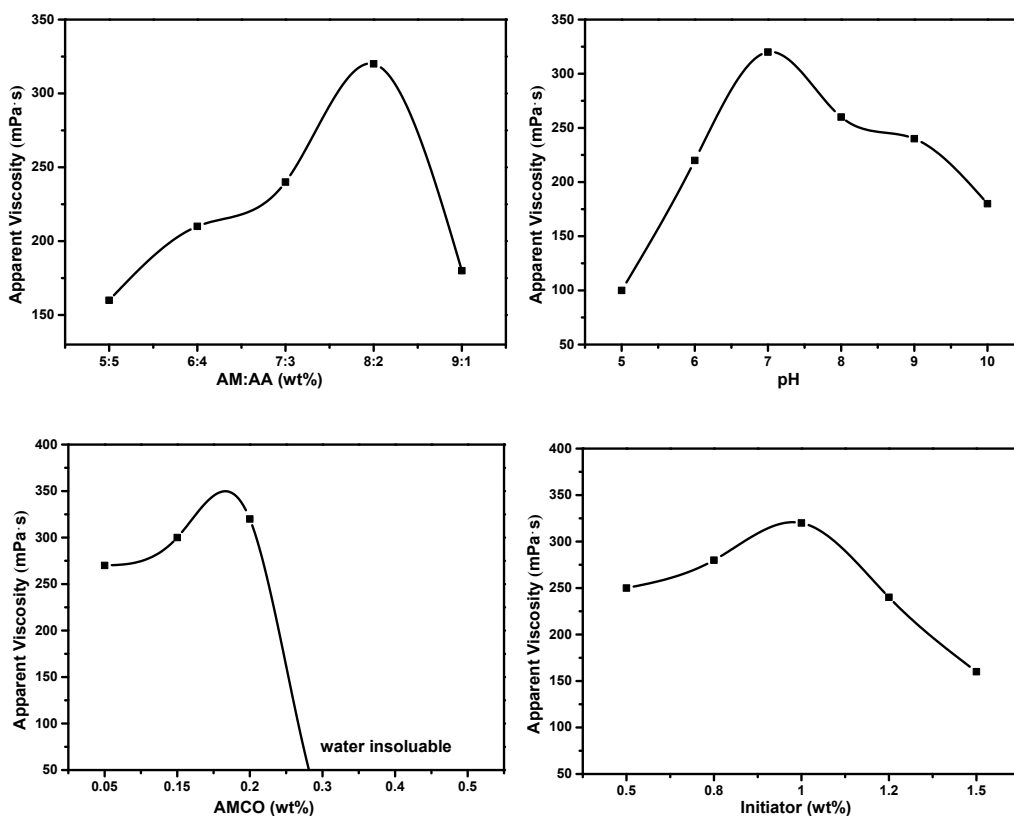

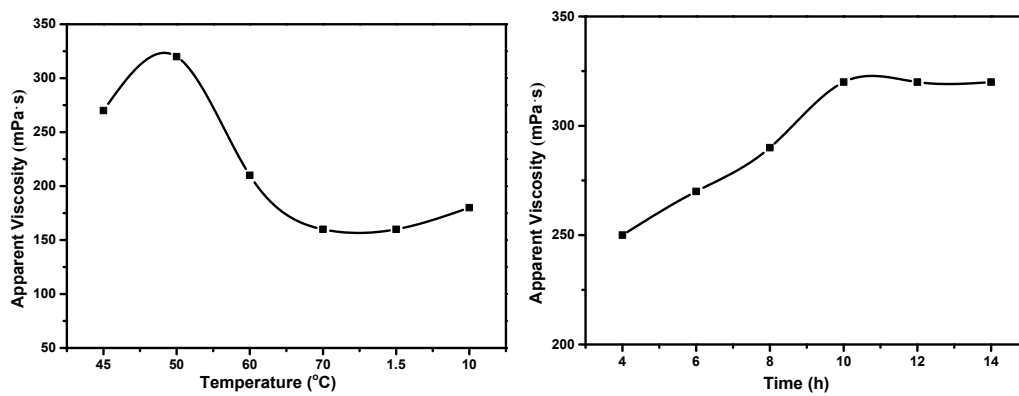

**Figure S1.** The effect of synthesis conditions on copolymerization of PAAC.

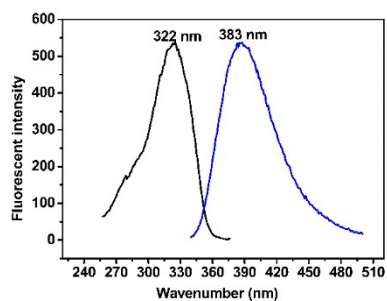

**Figure S2.** The Excitation and emission spectra of PAAC.
